# Supplementary material for: Structural modulation of CdS/ZnO nanoheterojunction arrays for full solar water splitting and their related degradation mechanisms
Source: Royal Society of Chemistry journal article supplement (doi:10.1039/c8cy01549j), 2018-01-01
Supplement: c8cy01549j1.pdf [file c8cy01549j1.pdf]

# **Structural modulation of CdS/ZnO nanoheterojunction arrays for the full solar water splitting and the degradation mechanisms**

Weijie Yang,<sup>a</sup> Weibing Wu,<sup>\*a</sup> Wenwen Chen,<sup>a</sup> Jizuo Zhao,<sup>a</sup> Xun Hu.<sup>a</sup>

<sup>a</sup> School of Materials Science and Engineering, University of Jinan, Jinan, 250022, Shandong, China

\*Corresponding author E-mail: mse\_wuwb@ujn.edu.cn

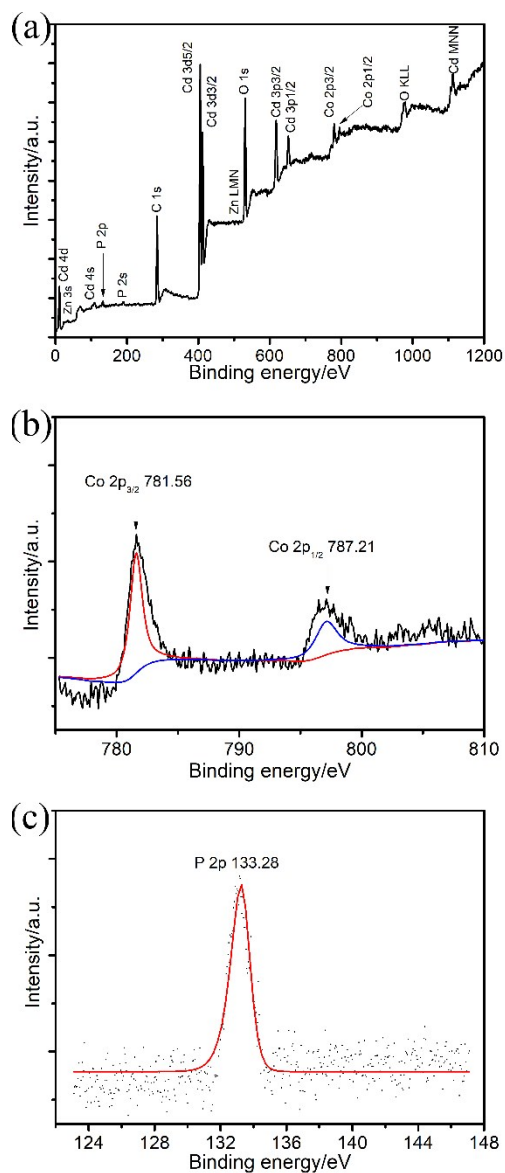

**Fig. S1** XPS survey scan from CdS/ZnO-CoPi electrode. (a) over a large range at low resolution, (b) Co 2p and (c) P 2p at high resolution.

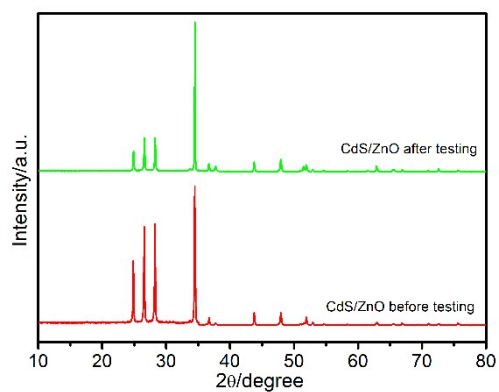

**Fig. S2** XRD patterns of CdS/ZnO NHA before and after PEC test.

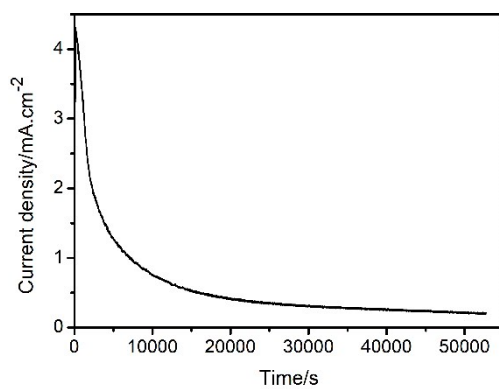

**Fig. S3** The i-t curve of CdS/ZnO-CoPi NHA with CdCl<sub>2</sub> heat treatment in 1M phosphate electrolyte

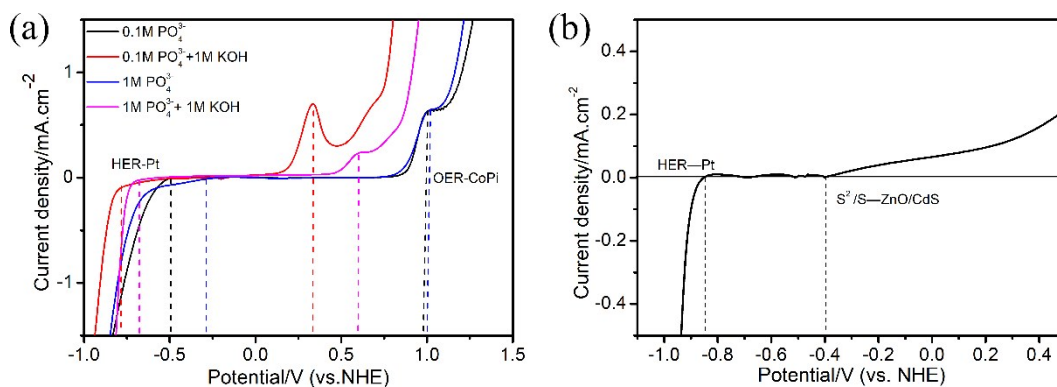

**Fig. S4** (a) The LS curves measured on Pt and FTO/CoPi electrode in different electrolyte solutions. (b) The LS curves measured on Pt and CdS/ZnO electrode in 0.35 M  $\text{Na}_2\text{S}$  and 0.25 M  $\text{Na}_2\text{SO}_3$  sacrificial solution.

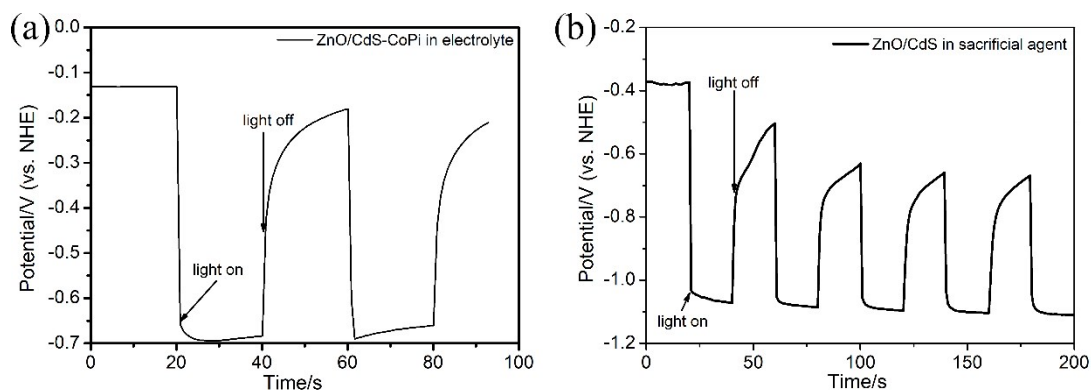

**Fig. S5** The dark and light potential measured in different electrolyte solutions in open circuit configuration. (a) CoPi-CdS/ZnO NHA with  $\text{CdCl}_2$  heat treatment in 0.1 M phosphate solution (pH=14) for the full water splitting. (b) CdS/ZnO NHA in the 0.35 M  $\text{Na}_2\text{S}$  and 0.25 M  $\text{Na}_2\text{SO}_3$  sacrificial solution.
